# Supplementary material for: Electroencephalographic features of the developing brain in 72 dogs under xylazine sedation: a visual and statistical analysis
Source: Frontiers journal article supplement (doi:10.3389/fvets.2023.1150617), 2023-06-29
Supplement: Data_Sheet_1.PDF [file Data_Sheet_1.PDF]

## Supplementary Graphics and Figures

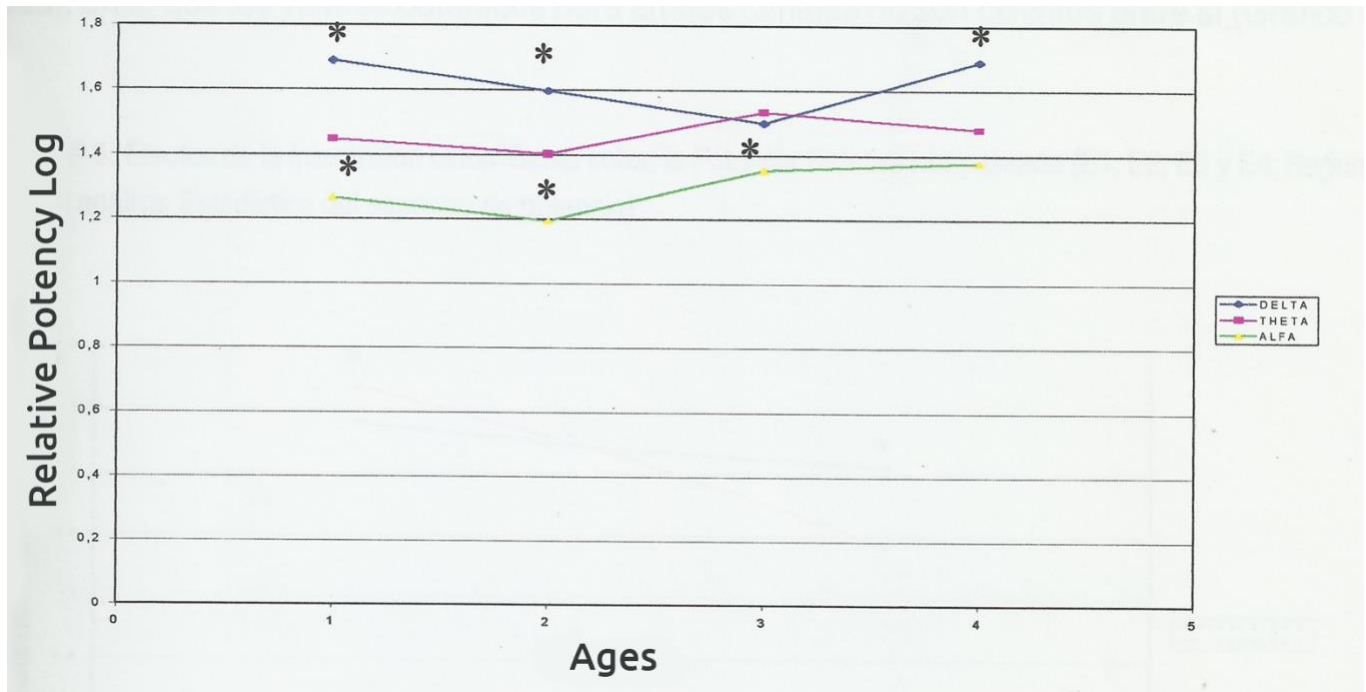

**Figure 1.** Effects of interaction Age/Channel over the normalize relative potency in groups 1 (0-5 months), group 2 (6-11 months), group 3 (12-17 months) and group 4 (18-23 months). Blue line delta activity, pink line theta activity and green line alfa activity.

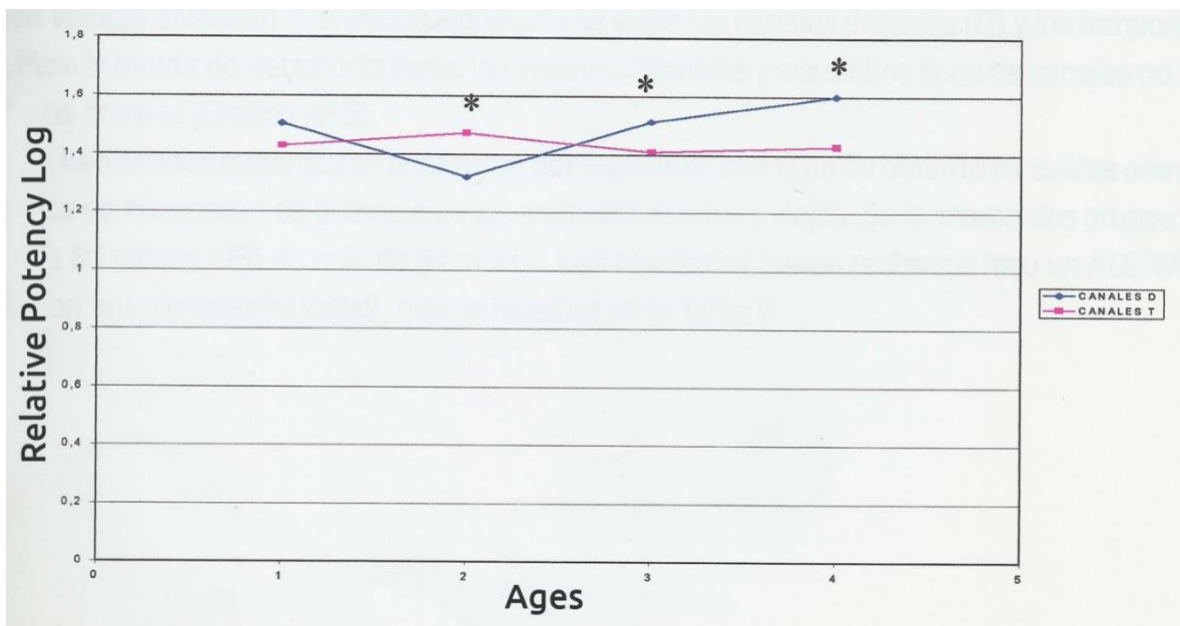

**Figure 2.** Effects of interaction Age/Channel over the normalize relative potency in groups 1 (0-5 months), group 2 (6-11 months), group 3 (12-17 months) and group 4 (18-23 months). Second stage of power spectrum statistical analysis. Blue line dorsal Channels, pink line temporal channels.

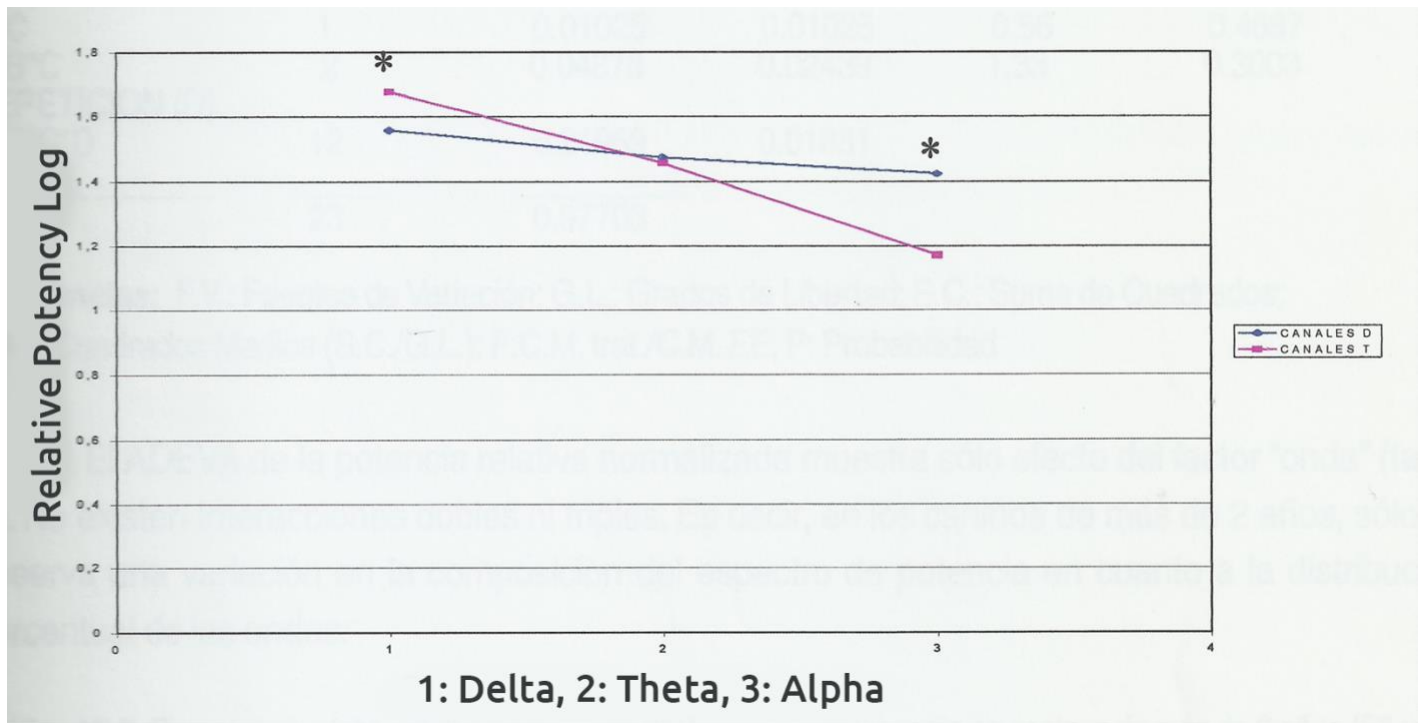

**Figure 3.** Effects of interaction rhythm/channels over the normalize relative potency in groups 1 (0-5 months), group 2 (6-11 months), group 3 (12-17 months) and group 4 (18-23 months). Second stage of power spectrum statistical analysis. Blue line dorsal Channels, pink line temporal channels.

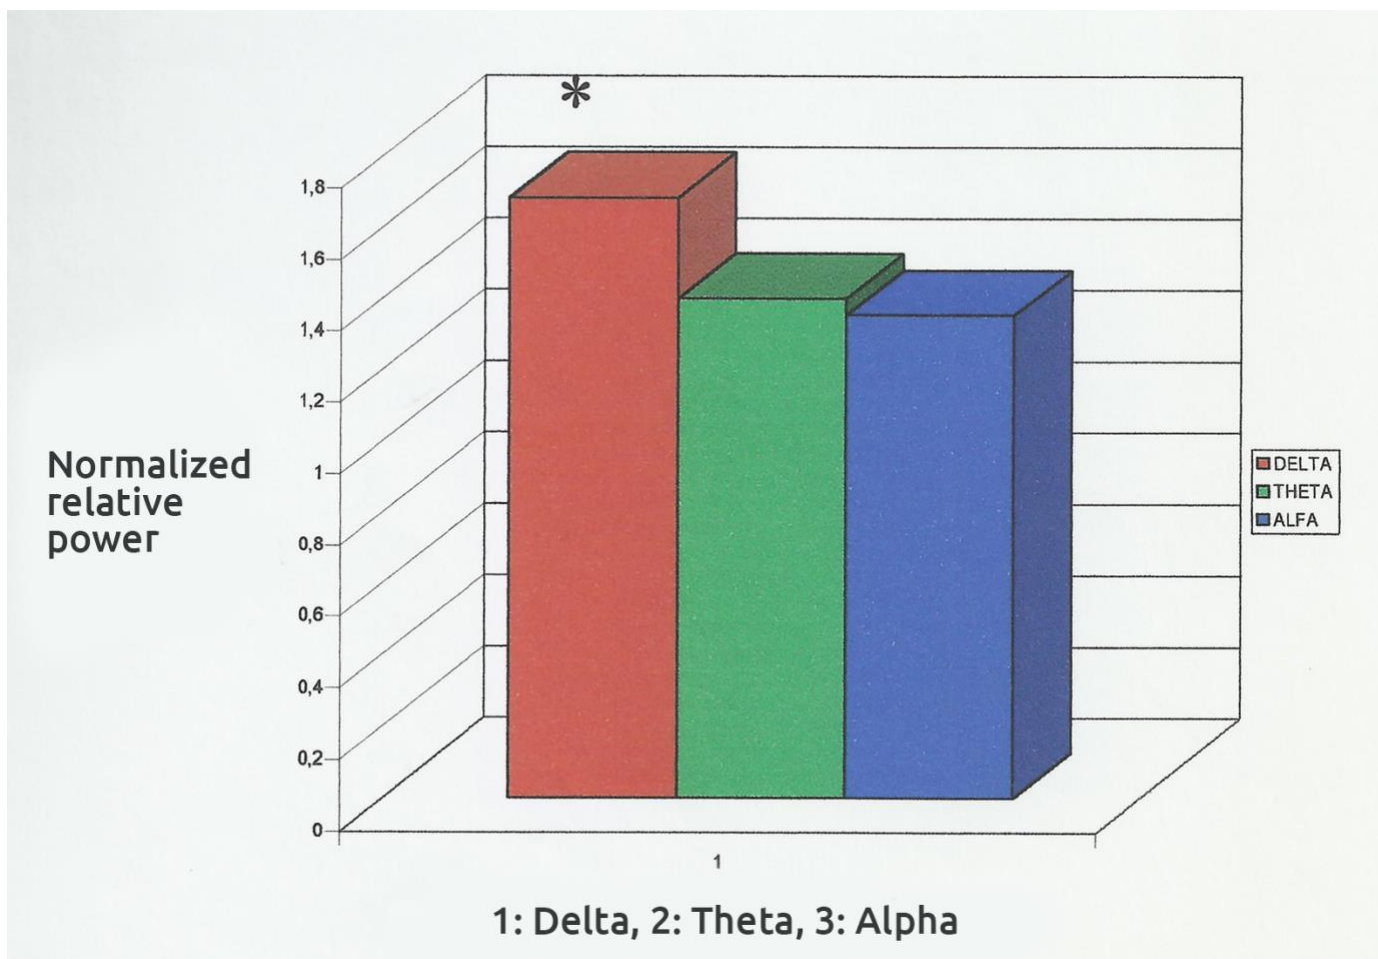

**Figure 4.** Composition of power spectrum frequency bands in dogs older than 2 years. Groups 5 (23-83 months) and group 6 (> 83 months). Second stage of power spectrum statistical analysis. Red Column delta rhythm, green column theta rhythm and blue column alpha rhythm.
